# Supplementary material
Source: PubMed Central journal article supplement (PMC6860014)

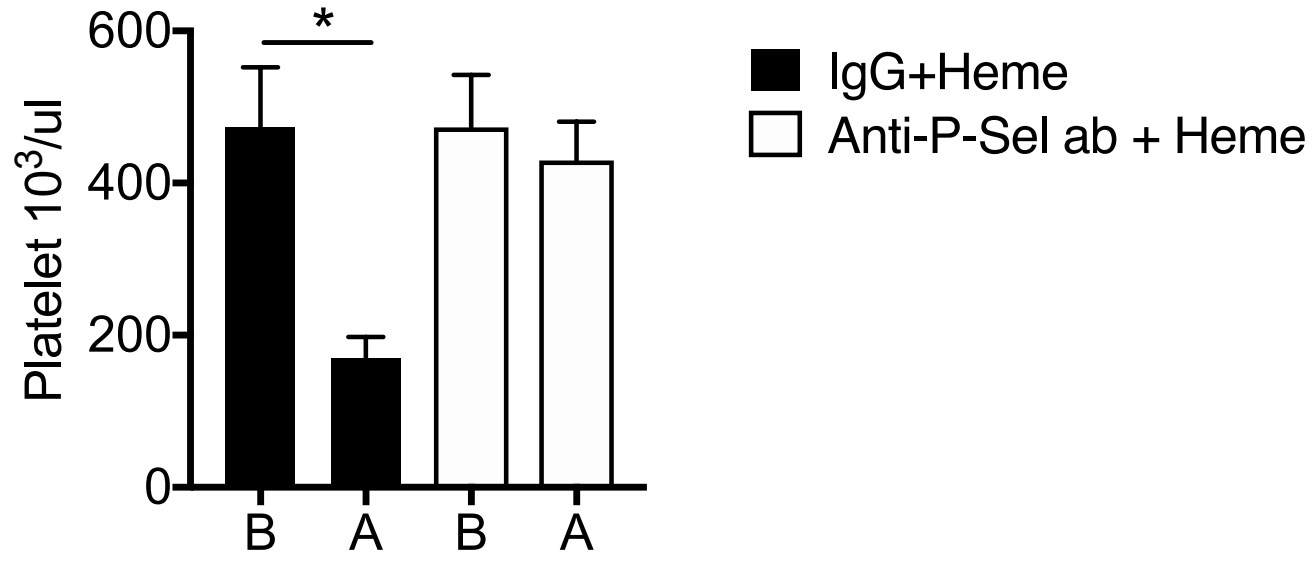

**Supplementary Figure 1**

Supplement: NIHMS1011173-supplement-Supp_FigS1.pdf [file NIHMS1011173-supplement-Supp_FigS1.pdf]

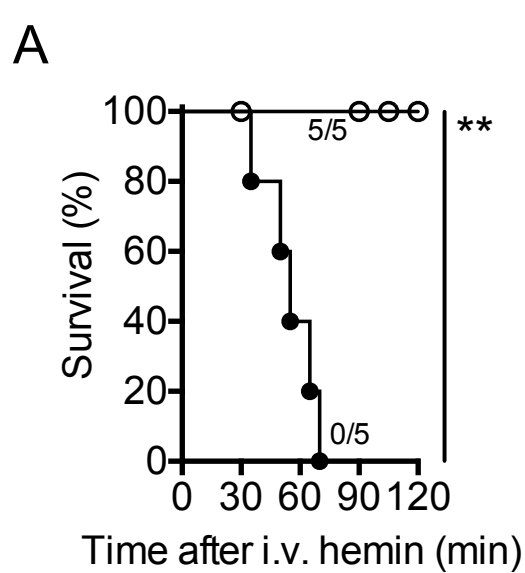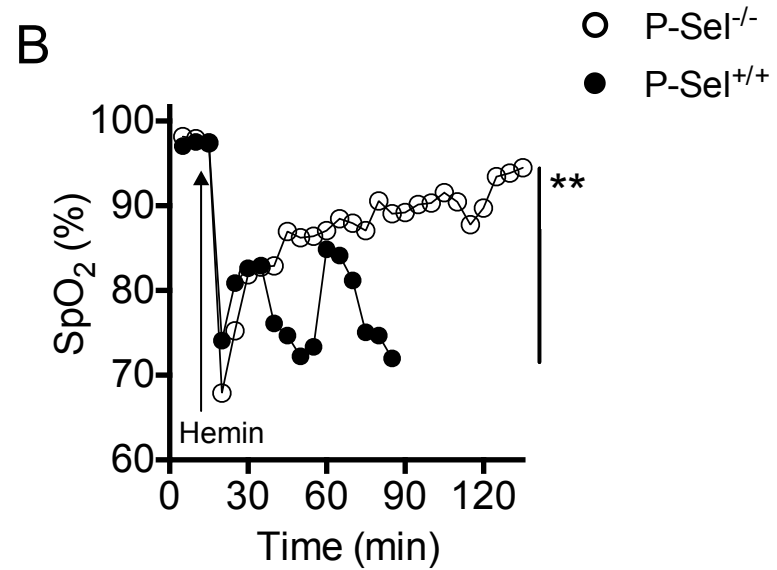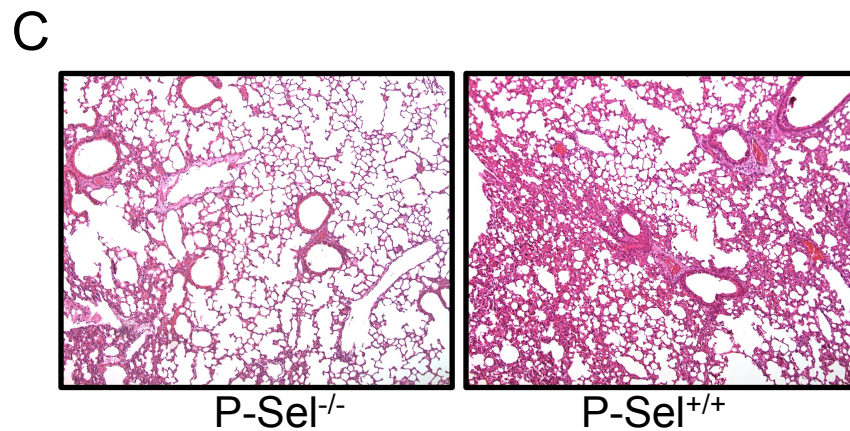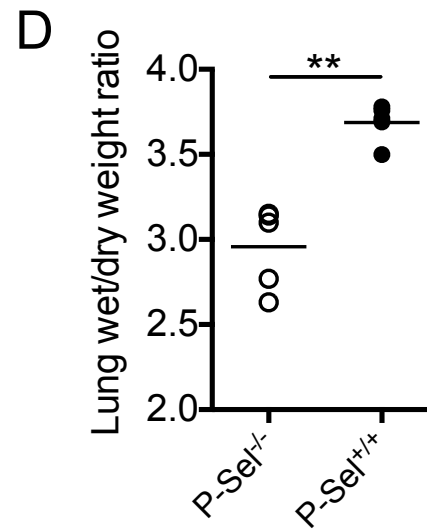

Supplement: NIHMS1011173-supplement-Supp_FigS2.pdf [file NIHMS1011173-supplement-Supp_FigS2.pdf]

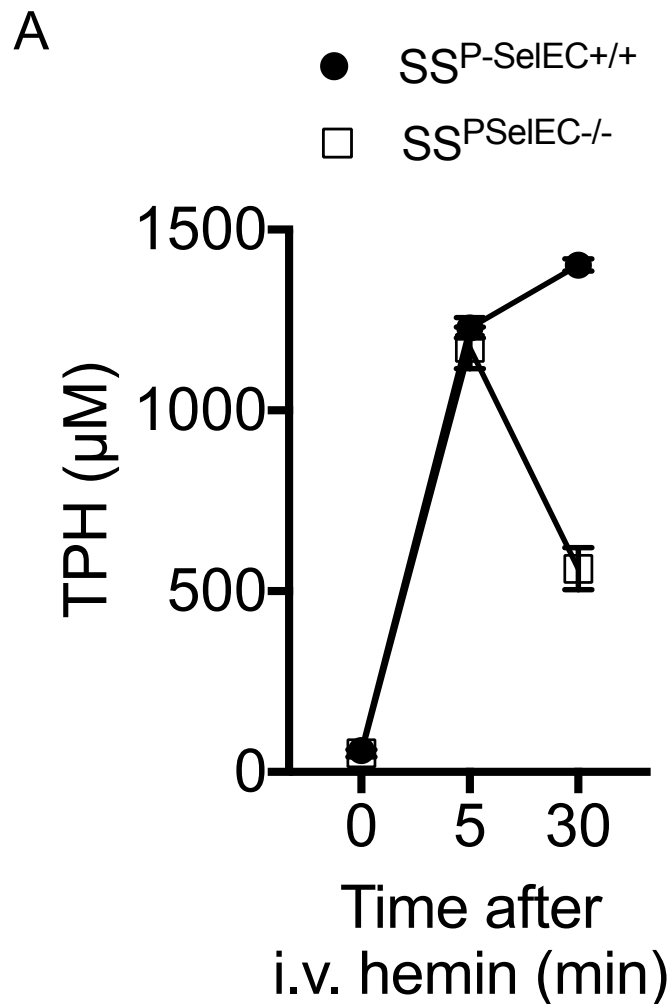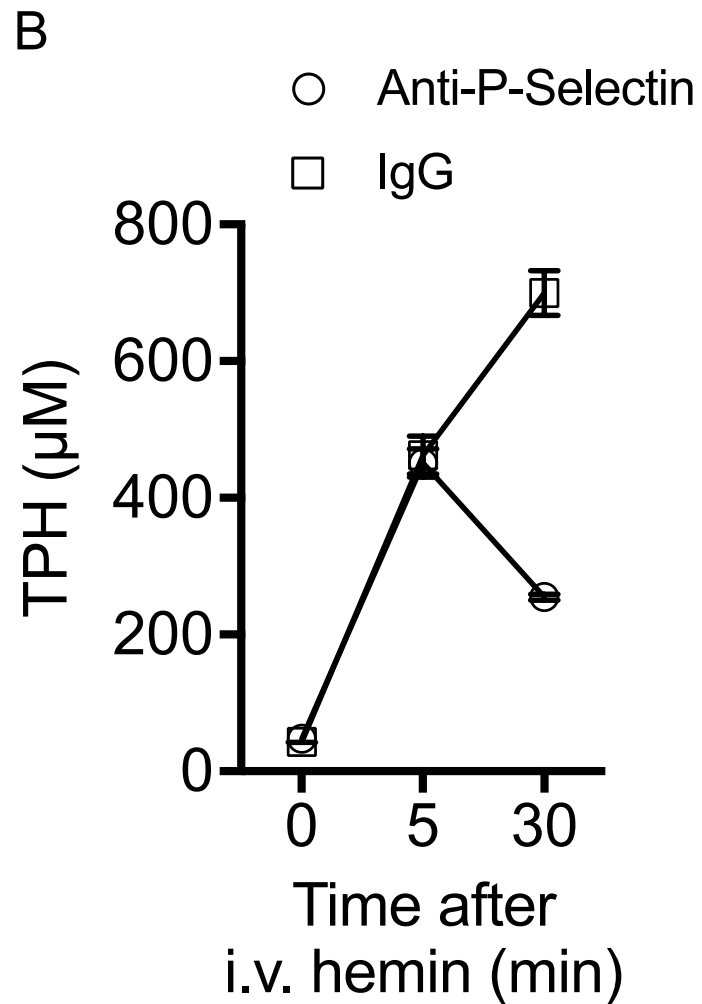

**Supplementary Figure 3**

Supplement: NIHMS1011173-supplement-Supp_FigS3.pdf [file NIHMS1011173-supplement-Supp_FigS3.pdf]
